# Supplementary material for: Circulating nano-particulate TLR9 agonist scouts out tumor microenvironment to release immunogenic dead tumor cells
Source: PubMed Central journal article supplement (PMC5226476; doi:10.18632/oncotarget.10379), 2016-07-01
Supplement: oncotarget-07-48860-s001.pdf [file oncotarget-07-48860-s001.pdf]

# Circulating nano-particulate TLR9 agonist scouts out tumor microenvironment to release immunogenic dead tumor cells

## Supplementary Material

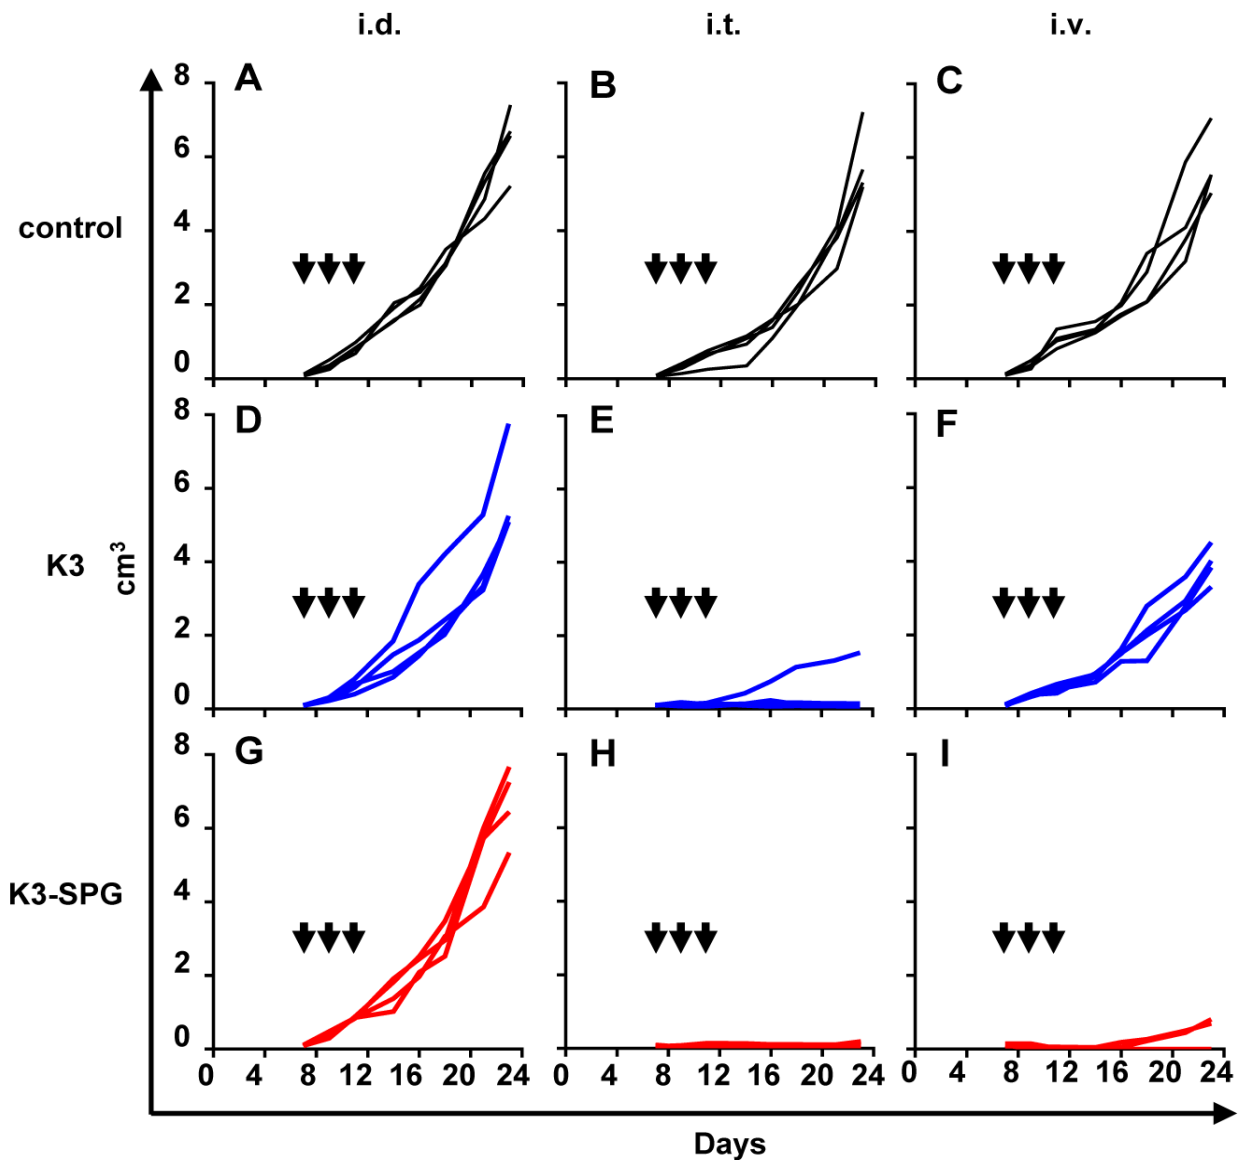

**Supplementary Figure 1. K3-SPG i.v. without antigen can be applied for EG7 tumor model**

C57BL/6 mice were inoculated s.c. with EG7 cells at day 0 and were administrated intradermally (i.d.) (peritumoral area) (A, D, G), intratumorally (i.t.) (B, E, H), or intravenously (i.v.) (C, F, I) with PBS (A-C), K3 (30  $\mu$ g) (D-F), or K3-SPG (10  $\mu$ g) (G-I) at day 7, 9, and 11. The size of tumor were was measured for 23 days (n=4). Each curve represents individual mouse. Arrows indicate timing of therapy

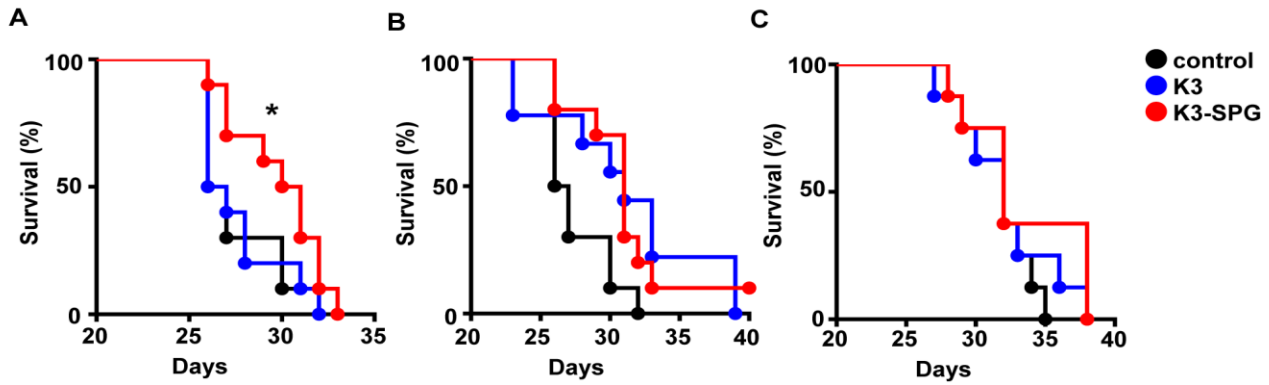

**Supplementary Figure 2.** The dose escalation test of systemic administration of K3 and K3-SPG without tumor antigen in pancreatic cancer peritoneum dissemination model C57BL/6 mice were i.p. injected with Pan02 at day 0 and were treated i.v. with PBS, K3 or K3-SPG three times. Survival rate (%) was representative (n=10). \* $p < 0.05$  (Gehan-Breslow-Wilcoxon test). (A) K3 (10 µg) K3-SPG (10 µg) (B, C) K3 (50 µg) K3-SPG (50 µg)

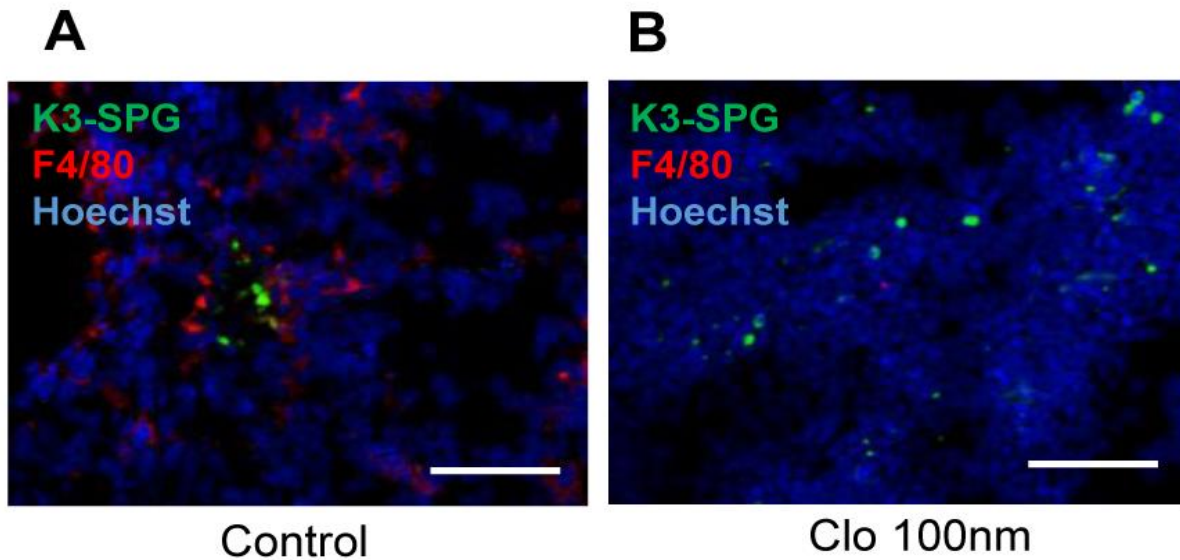

**Supplementary Figure 3.** F4/80 positive cells in the tumor were depleted by clodronate liposome

C57BL/6 mice were inoculated with EG7 at day 0 and administrated i.v. with liposome (A) or liposome (B) day 5, and treated i.v. with Alexa 647-K3-SPG at day 7. One hour after treatment, the frozen section of tumor was stained by anti-F4/80 antibody (red) and Hoechst33258 (blue) and then analyzed by fluorescent microscopy. (scale bars, 100µm)

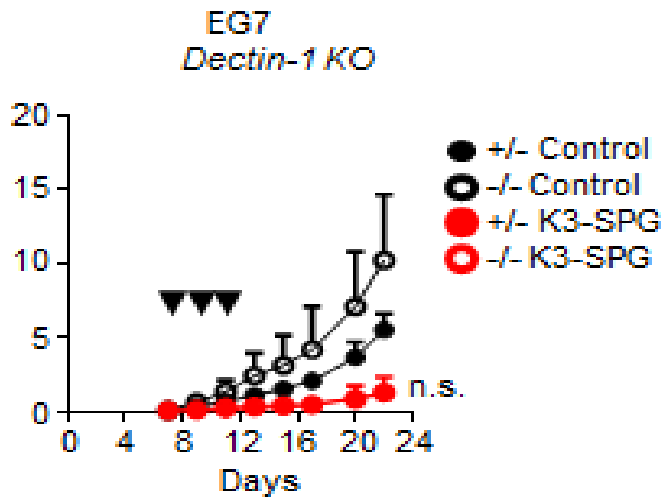

**Supplementary Figure 4. Tumor regression effect of K3-SPG is not dependent on *Dectin-1* signal.**

*Dectin-1* KO and hetero mice were inoculated with EG7 at day0 and were treated with intravenous injection with K3-SPG at day7, 9, and11. n=5 (*Dectin-1*). Tumor growth is shown as mean + SEM. n.s.; not significant.  $p < 0.05$  (*t*-test).

**A**

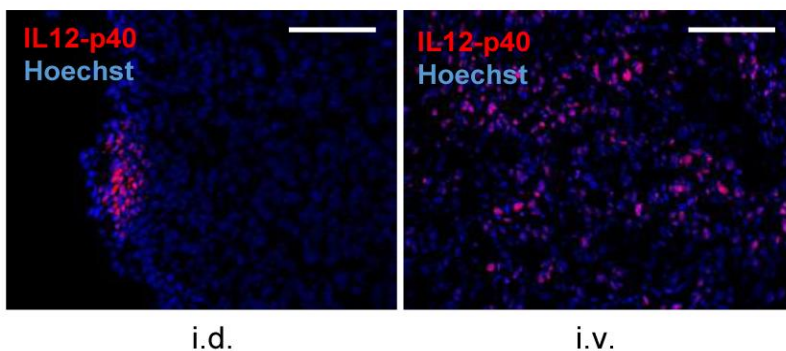

**B**

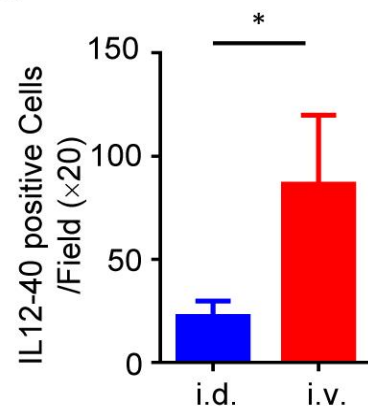

**Supplementary Figure 5. IL12-p40 was detected in tumor-microenvironment**

(A) C57BL/6 mice were inoculated with MC38 at day 0 and were treated i.d. or i.v. with K3-SPG at day 14, 16, and 18. Twelve days after inoculation, tumor was collected and the frozen section was stained by anti-IL12-p40 antibody (red)

and Hoechst 33258 (blue) and then analyzed by fluorescent microscopy. (scale bars, 100 $\mu$ m) (B) IL12-p40 positive cells were counted (10 fields each from 3 tumors). Error bars represent mean + SD. \* $p < 0.05$  ( $t$ -test).

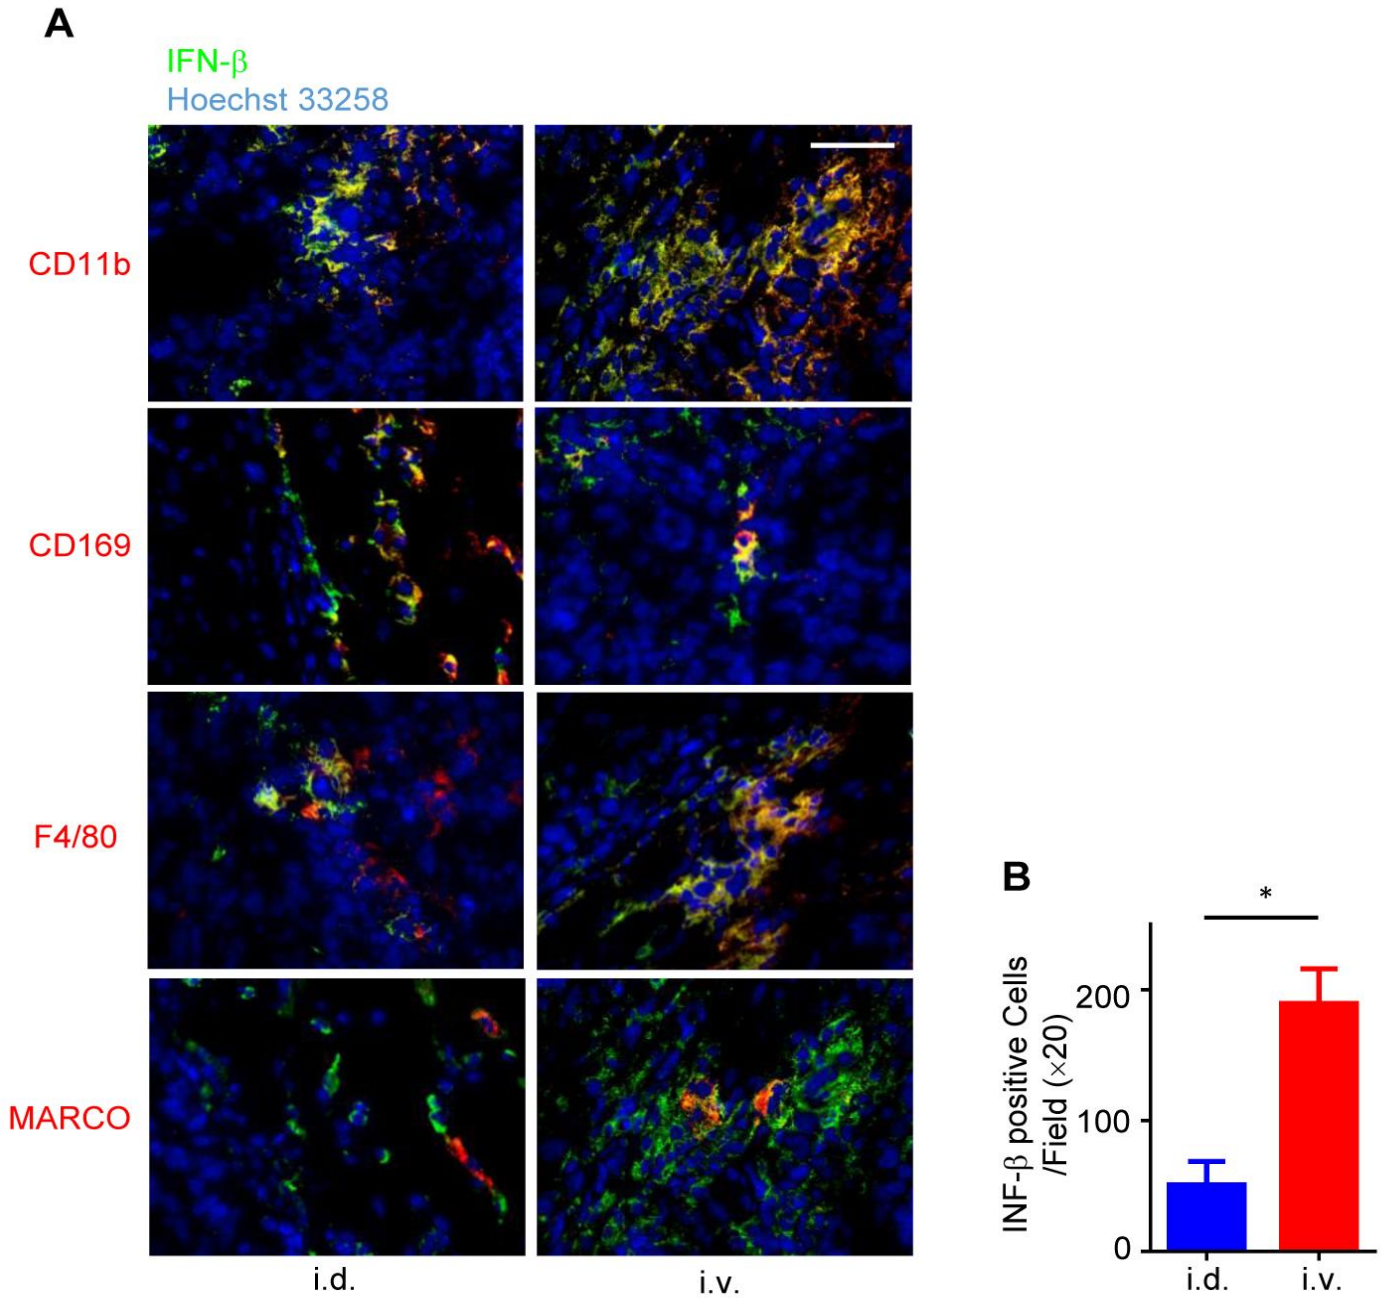

### Supplementary Figure 6. IFN- $\beta$ was detected in tumor-microenvironment

(A) IFN- $\beta$  GFP mice were inoculated with MC38 at day 0 and were treated i.d. or i.v. with K3-SPG at day 14, 16, and 18. Twelve days after inoculation, tumor was collected and the frozen section was stained by anti-CD11b, CD169, F4/80, MARCO antibody (red) and Hoechst 33258 (blue) and then analyzed by fluorescent microscopy. (scale bars, 100 $\mu$ m) (B) IFN- $\beta$  positive cells were counted (10 fields each from 3 tumors). Error bars represent mean + SD. \* $p < 0.05$  ( $t$ -test).

**A**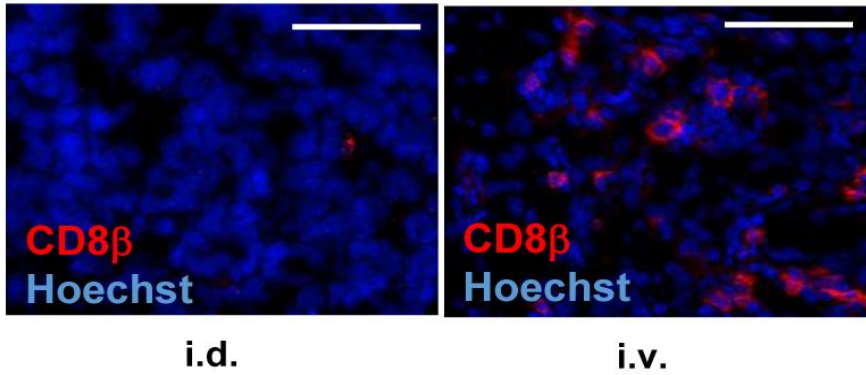**B**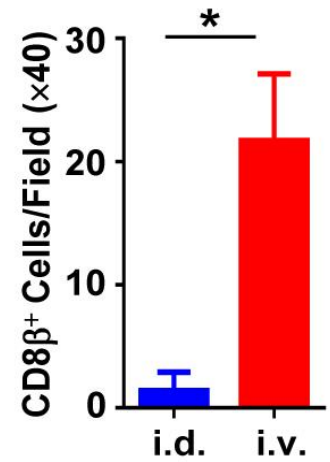**Supplementary Figure 7. CD8<sup>+</sup> T-cells was detected in tumor microenvironment**

(A) C57BL/6 mice were inoculated with EG7 s.c. at right flank at day 0 and were treated with i.d. or i.v. with K3-SPG at day 7, 9, and 11. (B) At twelve days after inoculation, tumor was collected and the frozen section was stained by anti-CD8 $\beta$  antibody (red) and Hoechst 33258 (blue) and then analyzed by fluorescent microscopy. (scale bars, 100 $\mu$ m) CD8 $\beta$  positive cells were counted (10 fields each from 3 tumors). Error bars represent mean + SD. \* $p < 0.05$  ( $t$ -test).

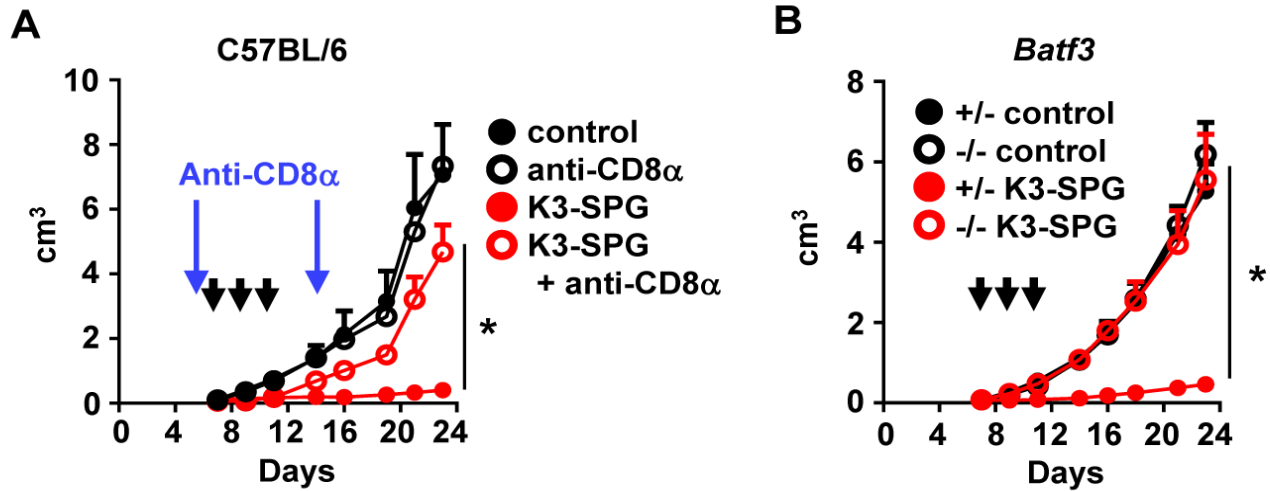

**Supplementary Figure 8. K3-SPG-induced tumor regression requires immune responses**

(A) C57BL/6 mice administered CD8 $\alpha$ -depleting antibody (200  $\mu$ g/mouse) or not at day 6 and 13, and were inoculated with EG7 s.c. at right flank at day 0 and were treated with i.v. with K3-SPG at day 7, 9, and 11 (black arrow). (B) *Batf3* hetero and deficient mice were inoculated with EG7 s.c. at right flank at day 0 and were treated with i.v. with K3-SPG at day 7, 9, and 11 (black arrow). Error bars represent mean + SEM (n=4). \* $p < 0.05$  (*t*-test). Arrows indicate timing of therapy.
